# Supplementary material
Source: PubMed Central journal article supplement (PMC549617)

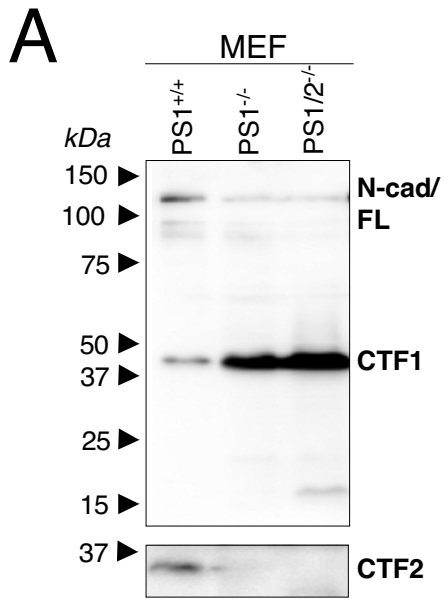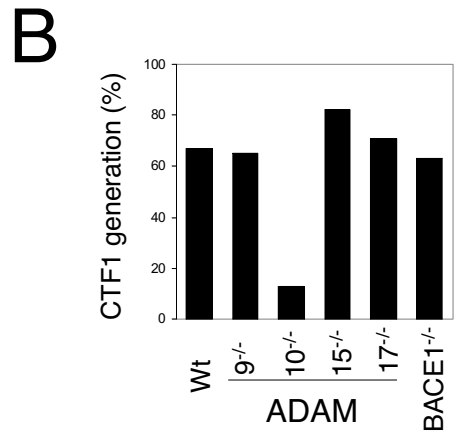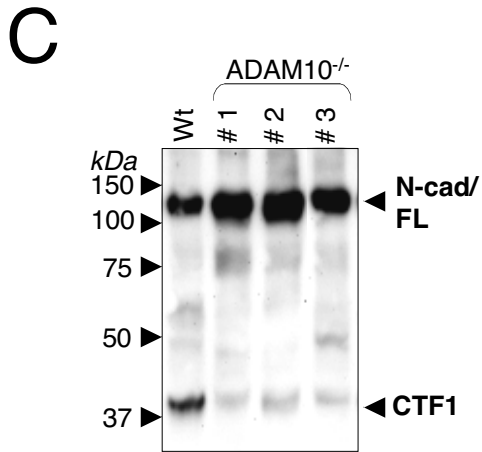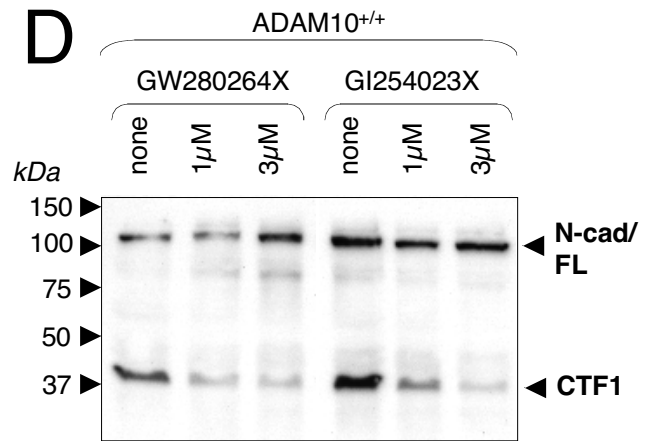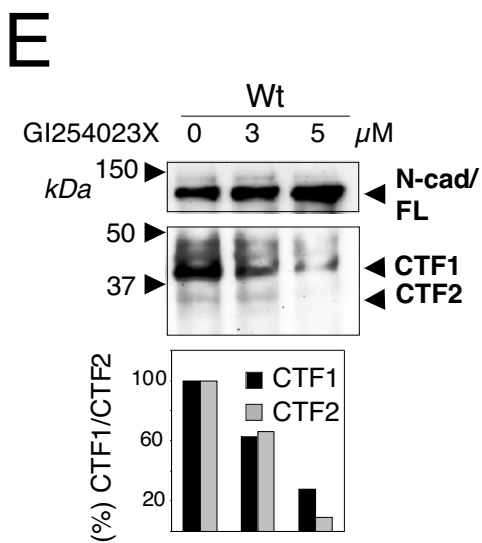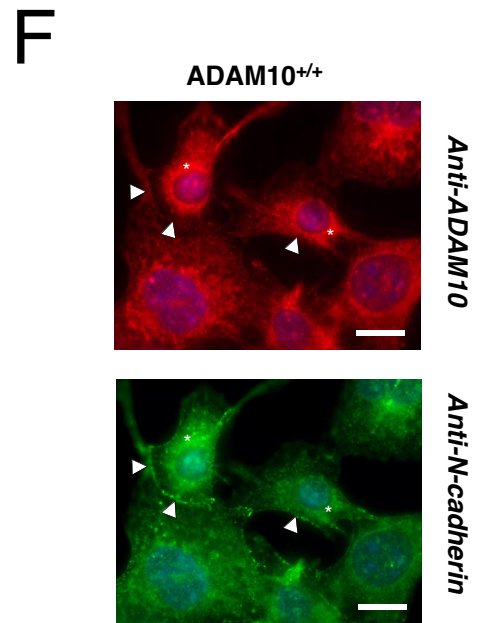

Supplementary Figures

**G**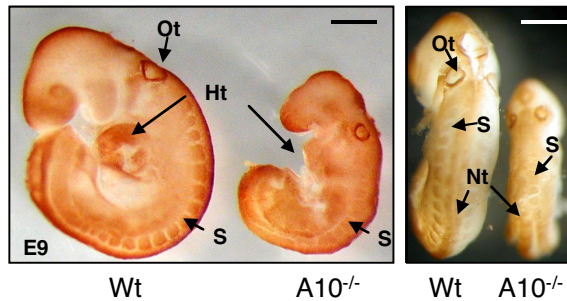**H**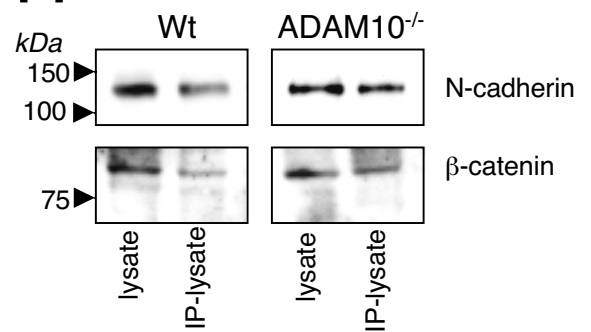**I**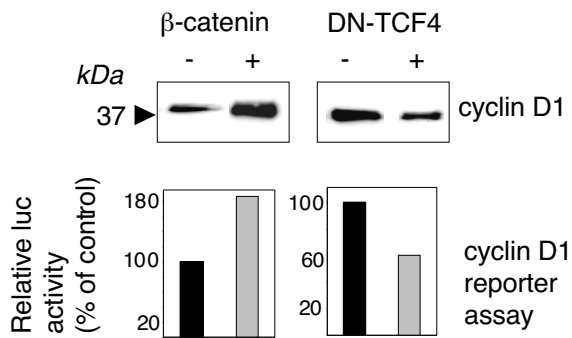**J**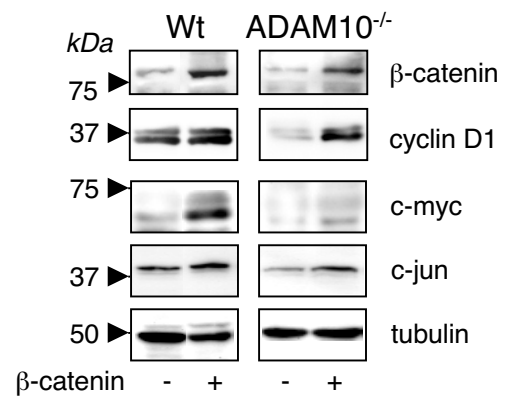**K**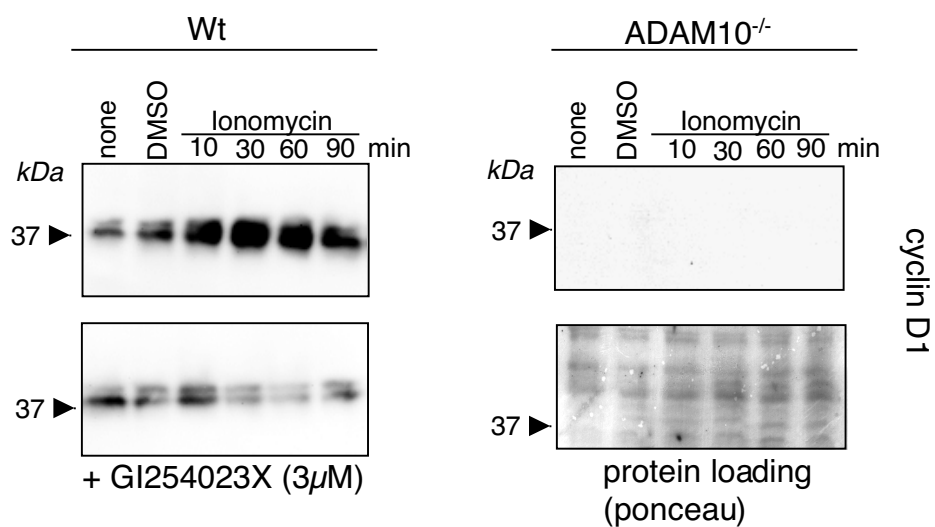*Supplementary Figures*

Supplement: 7600548s3.pdf [file 7600548s3.pdf]
